# Supplementary material
Source: PubMed Central journal article supplement (PMC5114403)
Supplement: 10.1074_M115.708594_jbc.M115.708594-1.pdf [file 10.1074_M115.708594_jbc.M115.708594-1.pdf]

| NCBI gene symbol | Target seq 1           | Target seq 2           |
|------------------|------------------------|------------------------|
| POLE2            | TTCCGTGAAGACTTAGTAAAT  | TACCGAATGCCTCTGCATAAA  |
| MPG              | CCTGTACGTGTACATCATTTA  | CACCGCCAGCCGTGTCCTCAA  |
| NFKBIL2          | AACCACCTTTACGAGGACCTA  | CTGGGTAGTGCTTTCCAAGAT  |
| CA14             | CGGGATCTCTCCTTAGGATAA  | GTGGGTGAGACTAAGAATATA  |
| TGFB2            | TGGATGCGGCCTATTGCTTTA  | CAGGTATTGATGGCACCTCCA  |
| PRPF19           | AAGTACATTGCGGAGAATGGT  | CCCGGCCATTCTGAAAGCTTT  |
| TERF2            | TGGGCTATGTAGGCAGGTAA   | AAGGAACTTAGTCTGTTATGA  |
| HIST1H1E         | CTCGCTCACGCTTGCCTTCAA  | AGCGGCGAAGAAGCCCAAGAA  |
| DNAJC5           | CTGCTGCTGCGGGAAGTGTA   | CGCCAACCTTAGAATCATGAA  |
| EXO1             | CAGATGTAGCACGTAATTCAA  | ATGGATGTACTTTACCTTCTA  |
| BTG2             | CAGGCCTGTCTCTCCTATTA   | CTCGAGTTTCCCAAACCGAAT  |
| POLB             | TACGAGTTCATCCATCAATTT  | CAGGTTGTGGAGCAGTTACAA  |
| ALKBH2           | CACGGACGTGTTGCAGTGATA  | ATGGACAGATTCCCTGGTGAAA |
| XAB2             | CCGCGTGTACAAGTCACTGAA  | CACGTACAACACGCAGGTCAA  |
| SUMO1            | CAGTTACCTAATCATGTTGAA  | CTGAAGTGCCTTCTGAATCAA  |
| HNRNPM           | AAGACTTGGAAGCACAGTATT  | AAGCTGTGCAAGCTATATCTA  |
| UPF1             | TGGCGTCATCATTGTGGGCAA  | ATCAAGGTCCCTGATAATTAT  |
| ESPL1            | CAGCAGCTGACTGCTAAGCTA  | CAACTAGTGGACAGTTGTAAA  |
| RRM2             | GCGGGATTAACAGTCCTTTA   | AGCAAGCGATGGCATAGTAAA  |
| POT1             | TGCCGCTATTACAACCTTACAA | GAGGGCGATTTGGATATAAATT |
| PCNA             | ATGGATTTAGATGTTGAACAA  | AAGGATCTTAGGCATTCTTAA  |
| C7orf11          | TAGAGATTTACGTTTTCCATA  | CCCAGGGTTCTCCAAGGACAT  |
| LMNA             | CCAGGAGCTTCTGGACATCAA  | AACTGGACTTCCAGAAGAACA  |
| RNF8             | CCTCATCGTATCTAAGGATAA  | CAAATGGTAAACTGTACGCTA  |
| DHFR             | AACCTCCACAAGGAGCTCATT  | AAGAATTAATTGAGCCCACGA  |
| PARP3            | CCAGAGCGAGTACCTCATCTA  | CAAGGCCATACCCGCAGAGAA  |
| CACNA1G          | CCTGGTGTACATCCTTCGTAA  | CCGGAGCTTCATGCGGCTCAA  |
| RAD51L3          | TCAGAGCAGAGTGCCACATTA  | CCAAATCTTCCCGACAGCCAA  |
| FEN1             | TAAGTCCATTGTTACATGAAA  | CACCATTTCGCATGATGGAGAA |
| NTHL1            | ACCGTCTGTGAAGTGGCTTTA  | CAGGCTGAGGTGGACCAAGAA  |
| ERCC5            | AAGAAGATGCTAAACGTATTA  | CGCCATGGGAACTCAATAGAA  |
| DCLRE1B          | CCAGATCTCTATAGCAAAGAA  | CACCTACAGGTATCTAAGCAA  |
| BRCA1            | ACCATACAGCTTCATAAATAA  | CAGGAAATGGCTGAACTAGAA  |
| EEF1E1           | TTGAAGATAAAGTCTACCTTA  | ACCTTACAGGGTATAACTTTA  |
| RPS19BP1         | CAAGTCGGCACTGGACGAGTA  | CAGAGTAAACCTGAAGTTTCT  |
| MSH5             | CAGGATGAGAATATGACTCGA  | TTGCCAGACATTAGTGGATAA  |
| TINF2            | ACCAACCCAGGTATATCTAA   | AACGCCTTTGTATGGGCCTAA  |
| FANCA            | CCGCAGGTCACGGTTGATGTA  | CAGGGCCATGCTTTCTGATTT  |
| RPA1             | CAGGAATTATGTCGTAAGTCA  | TCCCTAGAACTGGTTGACGAA  |
| PTTG1            | CAGAATGGCTACTCTGATCTA  | AAGACCTGCAATAATCCAGAA  |
| MAD2L2           | CACCCGGAGCTGAATCAGTAT  | AAGATGCAGCTTTACGTGGAA  |
| SRSF1            | TTGGCAGGATTTAAAGGATCA  | CTGGACTGCCTCCAAGTGGAA  |
| FANCF            | CTGCGCTTCAATGGCTATAGA  | AAGATTAGGAATCTACGCATA  |
| GTF2H1           | CCCAGAGCTGATGCTATTGTA  | CGGATCCAACCCAGTTAGTTA  |
| GTF2H3           | ATGGCATTAAACAACATAGAA  | ATCAAGGATATTGGTGATTAA  |
| RFC4             | CAGAAGTCTATTATCACAGAA  | CCGATTCTGTCTTATCTGTAA  |
| FAM175A          | ATCGACTGGAACATTCTTAT   | CAGTACAAGCCTGGTAATCCA  |
| SLX4             | CAGCGAAAGCTTCTCCAGGAA  | CAGGCCCAATTTGAACAAAGA  |
| XRCC6            | ACCGAGGGCGATGAAGAAGCA  | AAGCTCTATCGGGAAACAAAT  |
| LIG3             | CTGGGAAGAGCTGGAAGATAA  | CTGGAAGATAATGAGAAGGAA  |
| NBN              | AAGGAAGACTGCCCTACTATA  | ATGGATATGCTCCAAAGGCAA  |
| REV1             | CTCCGGGAACAAGTAGAGCAA  | ATCGGTGGAATCGGTTTGAA   |
| DMC1             | GAGGATCAAGTTGTGGCGGAA  | AACGTACTTTATGCACGTGCA  |
| NEIL2            | CACCATCGTGAAAGATGGGAA  | AGCTGCTTGTTTACTCCTTAA  |

|          |                        |                        |
|----------|------------------------|------------------------|
| SBDS     | TTGGAAGTACTCAATCTGAAA  | TTCCGAGAAATTGATGAGCTA  |
| RBM14    | AACAGTTCGCCTTCGTGCACA  | CTCTCTGATTACCGCCGTTTA  |
| RAD54L   | AAGCATTTATTGGAAGCATTT  | AGGGACTGCCCATGAATTCAA  |
| LIG1     | CCGGACGTTTGAGAAGATCGA  | CAGCGAGGTCCTGAAACGCTT  |
| UHRF1    | CCGCTACGATGGCATCTACAA  | CCACGTGAAATACGACGACTA  |
| XRCC1    | TCGCATGTTTGGGCCTGACAA  | CCGCTCCGAGCTGCGAGATAA  |
| TK1      | TCGGCTCTGCTACTTCAAGAA  | CGGGCCGATGTTCTCAGGAAA  |
| ABL1     | AAAGACAAAAAGACCAACTTG  | AACTTGGTGAAGGTAGCTGAT  |
| MAD1L1   | CACGCTCAGGTTGAAGTCTGA  | CACGAGCAGCAGATTAAGGAT  |
| XPA      | TGGGAGCTGAGTGCTAGAGTA  | AGGGAGACGATTGTTTCATCAA |
| CBX5     | TTCTACAGGATGGGATCTAA   | TGCCGATGACATCAAATCTAA  |
| CRY2     | CCCGGGTGGCAGAGTTGCCAA  | AAGGACGACGGTGGCCAATA   |
| NUP98    | CTACTAAGGTTGGTACTAT    | AACCCTATTGCCAAACCTATT  |
| C19orf40 | AAAGGAATTGTAGTCGTTGAA  | TTCGGGTTAGAAATTCGAATA  |
| FANCB    | CTGCCATAGCTAAACATGAAA  | TACGGCAGCATCTGTTGCTTA  |
| DCK      | TTGGTATAAATTAATTTGTTA  | AAGTTGCAAAGTGGAAATTA   |
| RPIA     | TCGCTTCATCGTGATCGCTGA  | AACCACGTGAGGAATAACCAA  |
| FANCC    | CGCGAGGACCACCCGATTTAA  | TAGACTCTCCCTGATAGTTTA  |
| RNF168   | CAGTGCGGGATCTGCATGGAA  | ACGTGGAAGTGTGGACGATAA  |
| GEN1     | TTGCAATTGTTAAGACTCGAA  | CACCTAAGGATCATGAACGTA  |
| ERCC3    | CCGGTTACCTCCGATGCCAA   | CTCGTCCGCGAAGATGACAAA  |
| MBD4     | AAGCTTCTCATCGCTACTATA  | CAGGACCCGAAGCAAGTGCAA  |
| ALKBH3   | ATCGCTATCATCTTTAGGCCAA | CAGAGAGGATATAACTTATCA  |
| HMGB2    | CTGCAAAGAAATTTGGTGAAA  | AAAGGAGAAGTCGAAGTTTGA  |
| POLL     | CCGGGCAGAACTCTTTGAGAA  | CAGCCCATCTCTGATGATGAA  |
| SFPQ     | AATATGGAGAACCAGGAGAAAG | GAGAGGAAAGTTACAGCCGAA  |
| TREX1    | CTGGCAGCGCATGGGCGTCAA  | CAGCATCTACACTCGCCTGTA  |
| MLH3     | CAGAAGGTTGCTATATAGTAT  | ACGAATATAAGTTATGGGCTA  |
| RAD23B   | CTGGGATGACTTGGGCTCATA  | TAGGTGTCTAATTACTGTTTA  |
| GADD45G  | TGCGAGAACGACATCGACATA  | TCCGAGCTGAGGACTCTGCAA  |
| RAD1     | CAGCACCAATGTTATTAATAA  | CAGTATATGATTAGAAATGAA  |
| FAN1     | CTGCAGGATGACAGTTGCTTA  | CTGGTGGACGCCTTTCTCAA   |
| FANCL    | CACTCTCAAGTTGAAGGCAAA  | TAGGATAGTGTTCCTGAAGA   |
| RPA2     | AACAGTGGATTCCGAAAGCTAT | AGGGTGGGATTTCTTGAGGAA  |
| XRCC5    | AAGCGAGTAACCAGCTCATAA  | AAGCATAACTATGAGTGTTTA  |
| TDP2     | CGGAACGAATGAATCAGTTAA  | CCCAAGACCTATGTTGACCTA  |
| RPL5     | CAGCGTAACTCCAGACATGAT  | TACATGCGCTACTTAATGGAA  |
| ATR      | CAGGCACTAATTGTTCTTCAA  | AAGGACATGTGCATTACCTTA  |
| RPA3     | CACCACGTATCATTCCGCAAA  | TCCGCGCATTTAATTGGCGAA  |
| HERC2    | CAAGTCGGTGGCCACCTATAA  | CAGCGACGATTGAGATAACGA  |
| TDG      | AGGACGTATTCTAGTACAGAA  | TAGGTATTGCTTTGGTATATA  |
| CHAF1B   | CACCAATGTCAGGATCTGGAA  | ACGGAAAGTCTGGACCCTTGA  |
| ATRX     | CTCCAGTGCATTTCTATCGTA  | CCCAGCAATCACAGAAGCCGA  |
| CHEK2    | CTCCGTGGTTTTGAACACGAAA | CAGGATGGATTTGCCAATCTT  |
| RALY     | AACGTACCTGTCAAGCTCTTT  | TCAGGCAAGCAATGTAACCAA  |
| POLE     | ACAGATCGGAATATCCGGAA   | AACCGTATTTCTACATTGCGA  |
| PNKP     | CGGGAAGTCCACCTTTCTCAA  | CAAGCTGGTGATCTTACCAA   |
| POLM     | CCCAGACCACTCATCACATTA  | CTGCTGGACATAAGCTGGTTA  |
| BCL2L1   | TAGGGTGGCCCTTGCAGTTCA  | CAGCTGCCTCACTTCCTACAA  |
| FANCG    | CTCATTGAGGTAGAATTAATA  | CCGGCTCGTTCGACAGGCCAA  |
| HMGB1    | TCCTTTCATATAGTTAGCTAA  | AACCTTTACATGAGGACTCTA  |
| SIRT1    | AGCCATCGGAATGTTAAATTA  | TTGGGTCTTCCCTCAAAGTAA  |
| TOP3A    | AACAGCGACTGTACGAGTTTA  | TTCTCGAAAGTTGAGAATAAA  |
| INTS3    | CTCGAAGTCAAAGAATGCCA   | AAGACACGAAACCGAAGCCTA  |
| FANCM    | AAAGAGGTAAGTACTAATGTA  | TTCGACGATGTGAGTCTTTCA  |

|          |                        |                        |
|----------|------------------------|------------------------|
| WRNIP1   | ATGAATTAATGTTATAAGGAA  | CAAGCGGTTGCTGCCTACCAA  |
| MLLT1    | CCGCAAAGACTCCGAGAGCAA  | CAAGCCTGAGAAGATCCCTCAA |
| UBE2B    | GAGGCTCATGCGGGATTTCAA  | CAGAATCGATGGAGTCCAACA  |
| VRK3     | AAGTATCCAAGCGGCATTCAA  | CAGACCTTTGTCAATCCACAT  |
| RAD51C   | CTGCAAATATCAGAAGAGAA   | AAGAGAATGTCTCACAAATAA  |
| RFC1     | TTGGAGTAATACCAAGTGAA   | TCGGACTATGCCAGGCAAGAA  |
| POLG2    | AAGGAACAGCTAGTAGCATTT  | CTCCGGATTCTGTTAACGGTA  |
| CTPS2    | CTGCTACGCCTCTGTGTTCAA  | CACGGTGAAGTCTTCGTCTTA  |
| SLX1A    | CTGGGAGATGGTGCTCGTCGT  | CGAGAGCTTGTTCCGAAGCAA  |
| RAD50    | CAGGAACAGATTCAACATCTA  | CAGAAAGTGTATAATAAGAAA  |
| PARP4    | CAGGATGAGAGCCTGACATTA  | CAGAAGGCGAGCAGTTCTGAA  |
| TOPBP1   | CTAGGTGGATTGGTGATAGAA  | ATGAACCGCTTTCAGAGTAAA  |
| SMARCAL1 | TTGATTGGGTACAATGCGGAA  | CAGAACAGCATCAGAGGACTA  |
| RPA4     | TCAGGACGTTGTACCGTGTA   | AACGATGAGAGTCACCGCAAT  |
| PRKDC    | GACCCTGTTGACAGTACTTTA  | TTCGGCTAACTCGCCAGTTTA  |
| TDP1     | CTGGAGTTAAGCCAAAGTATA  | GTGGATAGATGTCATTACAA   |
| TERF1    | CACAGTATACTAGCTAACAA   | AACATGGATGAGTACCATATA  |
| KPNA1    | CCTCACGGTCATGGACTCTAA  | CTGGTATGAGGATTTGGAATA  |
| OGG1     | TCCGTGGACTCCCCTTCCAA   | CGGATCAAGTATGGACACTGA  |
| PMS2P4   | CTCATTGAAGTTTCAGACAAT  | TGCGGTGAAGGAGTTAGTAGA  |
| TOP2A    | CACGTAGGCTGTTTAAAGAAA  | ACGAATAACCATAGAAATGAA  |
| HNRNPU   | CTGGCCGTGGTAGTTACTCAA  | AGGATATTATTGAATACCCAA  |
| GADD45A  | AACATCCTGCGCGTCAGCAAC  | TCAATGGGTTCCAGTGATTAA  |
| PMS2P3   | TCTGCATGTTTCCAAGAGCAA  | CAGCACCTAGGCGGACGCGGA  |
| EP300    | CCCGGTGAACTCTCCTATAAT  | ACCAAGGGTTGCAAACGGA    |
| MLH1     | GTGGCTCATGTTACTATTACA  | AACCATCGTCTGGTAGAATCA  |
| RAD51L1  | TAGGAAATACCTGGAGTCACA  | AAAGTTCATCTTTATCGGGAA  |
| RPL11    | AAGGTGCGGGAGTATGAGTTA  | CTGGTCCAGCAGAAGTATGA   |
| C11orf30 | TTGGCTCTTCCCTAACGACAA  | AAGGCCGTTGTTCCAGTCTCA  |
| DDX17    | CCGGGAGCTACCAATATGATA  | CAGATCTGATATGGGACTATT  |
| KPNA3    | CTGTTCCGGACTATAGTCTA   | CCAGATGGCTACCAAATGATA  |
| BUB3     | ATGCATGATTTGAACACTGAT  | AAGTTGGGATCAGACAGTTAA  |
| PML      | CACCCGCAAGACCAACAACAT  | CAGGAGCAGGATAGTGCCTTT  |
| SIRT6    | TGGAAGAATGTGCCAAGTGTA  | CCGGCTCTGCACCGTGGCTAA  |
| OBFC2B   | CAGTGTCTTATCCACCCTAA   | AGGCCGAGTGACCAAGACAAA  |
| PER1     | CCCAGCGGTTGTCCAGCCCTA  | CCCGGACTCTCCACTGTTCAA  |
| SPO11    | TTGCATCATGATTACGGGAAA  | TACCTTCTACGATACTAACTAA |
| FANCE    | GAGGAAGTGCATCTCCTATTA  | CCCGAACATAAGTCACTGGAA  |
| XRCC2    | CAGGGTACTACGCAAGCCTTA  | GTGCATGGTGATATTCTTGAA  |
| ERCC4    | CTGCTCGACTGACGGGCTA    | CTCCTTGATGCACCACGTTAA  |
| CHEK1    | TTGGAATAACTCACAGGGATA  | CCCGCACAGGTCTTTCCTTAT  |
| MCM2     | CTCATTGGAGATGGCATGGAA  | GAGGCCCTATGCCATCCATAA  |
| UIMC1    | CCCTGATGGAGTAGACCCTAA  | CAGATTGCTTAGTGGACTTTA  |
| POLD1    | CCGAGAGAGCATGTTTGGGTA  | CTGGTCCACCTTCATCCGTAT  |
| XRCC3    | CCGCTGTGAATTTGACAGCCA  | AAGCCAAACTGAAATCGGTAA  |
| TOP1     | GCCCGAGGATATAATCATCAA  | TCCGGCATGATAACAAGGTTA  |
| RMI1     | CTGGTGTTCCGGTGGTGAGTCA | CAGGTAGTTCCTCAAATACCA  |
| BUB1     | TGGCACTTACATGAAAGTGAA  | CAGCTTGTGATAAAGAGTCAA  |
| EME1     | GAGGAGTGCAGCAGATAACAA  | CACAGCCAGTCAGGTTGCTAA  |
| RPS9     | CGGAGCTGGGTTTGTGCGAAA  | CCCGGGCCGCGTGAAGAGGAA  |
| EME2     | TACCAAGGCTCTCGCCAGTA   | GTGCGTGATGCCAAGGCTGAA  |
| SUPV3L1  | CTGGCACATGAGATCTTCGAA  | ATGGCCTTTACTTCCACCTAA  |
| CSNK1E   | GTGGTTGTTAATTTGAAGTAA  | GAGCTTTATCGTGGTTGTTAA  |
| POLD2    | CCGGGTGCCAGTGGAACCTA   | CAGTGGAGTGGGAGTGAAGAA  |
| RAD17    | CTCAGTGGAGATAATAATCAA  | TATCGGGATTCTCATACTTTA  |

|           |                        |                        |
|-----------|------------------------|------------------------|
| BRIP1     | TAGATAGTATGGTCAACAATA  | ACAGTCAAGAGTCATCGAATA  |
| SMC1A     | CACCATCACACTTTAATCCA   | AAGGGTCGACAGATTATCGGA  |
| REV3L     | ATGAGTATGGATCATATACAA  | CGGGATGTAGTCAAAGTCAA   |
| POLR1C    | TACGTGAACCACAAAGTGTAT  | CCCGGTAAGTATTCCGGTTAT  |
| APTX      | AAGCATTGGGCTGGTTATACA  | AACATTGGAATTCTTTCAATA  |
| ERCC6     | CAGGATGACATTAGCAGGTAT  | CAGGACTCGTGGTTCAAATTA  |
| YY1       | AACAATAGCTTGCCCTCATAA  | CAGAAGTGTGATTGGGAATAA  |
| SUCLA2    | ATGCGCTGTGATGTTATTGCA  | AAAGAACCTATTGATATTGAA  |
| IGHMBP2   | CACGACTGTGGTTGAGATCAT  | CCAGTTGAGCTTGGACCGAGA  |
| RAD23A    | CAGGCCTATTTGCGTGTGAA   | AAGGTGCTAAAGGAGAAGATA  |
| RECQL4    | CTCGGCCGCTACTTTGAGGAA  | TTCCATTATCATTTACTGCAA  |
| SETMAR    | ATGTTTATAATGGGCAGGTAA  | CCAAGTGTTCAGACGCATAA   |
| RAD9A     | GCCCGCCATCTTACCATCAA   | CAGGGTCATCCTGCGCAGCTA  |
| C10orf92  | TGCGTATTACTTGAAGCGTA   | CAAGTTCGTCGTGGACCCATA  |
| SMUG1     | CAAGAGCATCCTAAACGACCA  | CAGATTATGAGCTTACAGAAA  |
| APEX1     | CTGCATTCTATTTCTCATGTA  | CCAGATATACTGTGCCTTCAA  |
| ATRIP     | CCAGACGGAGTCAGGATACAA  | CAGGTTCTTATGATGGGTCAT  |
| SUPT16H   | CAGCATATGCATGACCGAGAT  | TCCCTAGTAATCAATAGCAA   |
| RAD54B    | CTGGATCAAATTAAGAATATA  | ACCCAAGAAATTATAAATAAA  |
| POLG      | CAGATGCGGGTCACACCTAAA  | CAGCCCTTTGCTGAGCGCTTA  |
| UBE2I     | ACCACCATTATTTACCCGAA   | CAAGAAGTTTGCGCCCTCATA  |
| LIG4      | ATCTGGTAAGCTCGCATCTAA  | TGGTGAGATGATGGCCTATAA  |
| DDB2      | CTGGATTCTTACCGGATATTA  | AGGGATCAAGCAGTTATTTGA  |
| ERCC8     | CAGAGTCAACACGGAGAGTTT  | CTCCAGCAGACAATCTTATTA  |
| CENPE     | CACGATACTGTTAACATGAAT  | CAGGTTAATCCTACCACACAA  |
| SSBP1     | AGCCTAAAGATTAGACTGTAA  | TCGGGTTAGATCGTCAGGAAA  |
| MSH3      | CGCCGCTAGAATTACAATACA  | CAGCAAGGAGTTATGGATTAA  |
| TNKS2     | CCCAGTGTAATGGCCTAGCA   | TTGCTGCAAGCTGCACGAGAA  |
| IP6K3     | CTGAGATACGTTACCCAATTA  | AAGACTGGTGGACAAGTGTA   |
| ERCC2     | AAGAACTGTGCCAGAGATTGA  | AAGACGGTGCTCAGGATCAAA  |
| SSRP1     | CTGGAGTTCAACGACGCTAT   | TACGATGAATATGCTGACTCT  |
| NEIL1     | GGCCGTGATGATGTTTGTTTA  | ATGATGTTTGTTTATGAGTTA  |
| DNA2      | TACCGCTTAAATCTAAGTCAA  | CGACGTCTTAATGTTGCTATA  |
| MAD2L1    | CTGAAAGTAACTCATAATCTA  | ATGGATATTTGTAAGTTTAA   |
| MSH6      | ATCGCCATTGTTGAGATTTA   | TGGCTGTAGGACCATAGTCTA  |
| SHFM1     | AACTAGAGAAACATGGTTATA  | GACAGTCGAGATGTCAGAGAA  |
| DDX1      | AAGGCACCGGATGGTTACATT  | TCCCGGGAGTTAGCTGAACAA  |
| ERCC6L    | ATCCTCGATGAAGCACATAAA  | AAGGATTGTTTCAGATGGCGA  |
| CETN2     | AACTGGGAAGATTTGTTCAA   | AAGCACATGTAAGTAGATTTA  |
| RECQL5    | CCCTGTAATTGTTGCAACCAT  | CACTTGCTAACCCCTAAAGGTA |
| TERF2IP   | TTGGGATAGATTCCAAATAAA  | CCGGATGTCTTTCTTTACCTA  |
| MMS19     | ATGGCTGTACAAAGAACATAA  | CAGCTTGTTGGCATCCGTACA  |
| DDX3X     | CTCGTAGTGATTCAAGAGGGA  | AACGAGAGAGTTGGCAGTACA  |
| MSH4      | ATAGCCCTACCTAGTGATCAA  | TTCGACCAGAATTTACTGATA  |
| PELP1     | CGGGCTTGTTGTTCTCTCAAA  | TTGGTGAGTCTCAGTAATGCA  |
| TMPO      | AACCAGGAAGCTATATGAGAA  | AAAGATGATCTAGATGTAACA  |
| TREX2     | CCGCTGATTAAGGCCGCTA    | CCAGGCCTCATTGTTGGCCAA  |
| APC       | ACGCGGAATTGGTCTAGGCAA  | AAGACCTGTATTAGTACGCCA  |
| TYMS      | CCGTGACCTATCAGTTATTAA  | CAGAGATATGGAATCAGATTA  |
| RDM1      | AAGGGTATCTCTCGGATTTCA  | TCCCAAGGCGAGGTCATGTAA  |
| PIF1      | AGGGAAGTCATATCTGCTAAA  | GAGCCTAACCAAAGAACATAA  |
| POLI      | AAGCCTCATAACAGTGAGATTA | TTCGGATTAGCGGTTTATTAA  |
| UBE2V2    | CAGAAGCTCCTCCGTCAGTTA  | AGGAGTTAAAGTTCCTCGTAA  |
| MNAT1     | AAGAGCAACTTCAGGGTACAA  | AAGGAGTTGAGATCAGGAAA   |
| HIST1H2BK | CTCGAAGAAAGCCGTGACTAA  | AGCGCTAAGTAAACTTGCCAA  |

|           |                        |                       |
|-----------|------------------------|-----------------------|
| HDAC1     | CCCGTTCTTAACTTTGAACCA  | CGGGATTGATGACGAGTCCTA |
| MSH2      | CCCATGGGCTATCAACTTAAT  | AAGAAGATGCAGTCAACATTA |
| RRM1      | CAGCTACATTGCTGGGACTAA  | ATCGCCTGAATTCTGCTATTA |
| POLA1     | CTGCATGAAAGCTACACTTCA  | CAGGATCTTAACACTGAGACA |
| NEIL3     | CCTGGATATTCTAACAGTGAA  | CAGATGGCCCTCGTACCTTAA |
| BLM       | AAGCGACATCAGGAGCCAATA  | GACGCTAGACAGATAAGTTTA |
| WRN       | CGGATTGTATACGTAACTCCA  | TCCGCTGTAGCAATTGGAGTA |
| USP1      | AACCCTATGTATGAAGGATAT  | ACAGGCATTAATATTAGTGGA |
| XPC       | TAGATGAGTGTTAAACTAGAT  | ATCGTCTGCGAGGAATTCAAA |
| HDAC2     | GACCCATAACTTGCTGTAAA   | TCCCAATGAGTTGCCATATAA |
| RAX2      | CAGCTGTCAGCCCATTCTATA  | CACCGTGTGCTCGCCATGTGA |
| MUS81     | CCGGGTATACCTGGTGAAGA   | ACCATTAAGTGTGGGCGTCTA |
| ERCC1     | CAGCAAGGAAGAAATTTGTGA  | TGGGCGGTACCTGGAGACCTA |
| DDX21     | AAGCGGAGTTTCAGTAAAGCA  | ATCCGAGTATATAGTGGTCAT |
| ENOSF1    | CTGCATGAGCATTTCAGTAT   | CGAGACATGATTGGACCGGAA |
| POLN      | CCCGGAACGTGCTATTTCAA   | CAGGAGGCACATCAACAATTT |
| CHAF1A    | AAGCGCTTTTCGCGTCTGCAA  | TTCCGAGAACTCAGTGTATGA |
| RPS3A     | CTCCATGATGTCTTCGTTAGA  | CTCACGTTGATGTCAAGACTA |
| MUTYH     | CCAGGTTGCCACTGTGATCAA  | AACCGGTGTGGTGGATGGCAA |
| RAE1      | TTCTGCGTAATGCAGCCGAA   | CTGCCTCATCTCTGTACGAAT |
| MRE11A    | CACATCTTTATTGAAC TTGAA | AAGGGTTATTTGAGCAAGTAA |
| H2AFX     | AAGCACCTAGATACCAGCACA  | TGCCTCCTAGGAGGACATTTA |
| APEX2     | CTGGCTATCGTTGAGGGTTAT  | ACGCTGCAGCACAACAATCAA |
| NHEJ1     | TCGATTGAAGACAGAACCATT  | AGGCAACAGGTTAAACTACCA |
| RAD52     | ACGGTCCATGCCTTTAATGTT  | AAGGATGGTTCATATCATGAA |
| TERT      | CCAGAACGTTCCGCAGAGAAA  | CTGGAGCAAGTTGCAAAGCAT |
| POLD4     | CCGGAAGCGGCTCATCACTGA  | CTGGAGGTGTGAGAGGCTCAA |
| XRCC4     | CAGCATGCCTATAATTACATA  | TTGGAAGATACCGGAAGTAGA |
| POLH      | CTGGTTGTGAGCATTTCGTGTA | CCCGCTATGATGCTCACAAGA |
| CLK2      | CAGCTACAGACGCAACGATTA  | CCGAAAGACAAGAAAGCAGAA |
| HIST1H4A  | CCGCAAGGTGTTGCGTGACAA  | ATCCGTGACGCTGTCACCTAT |
| NCOA6     | CAGCGTGCGTGTGACATTCAA  | CCAGTGTACGCTCGATAGTAA |
| TFAP2A    | TAGGTCAATCTCCCTACACGA  | CTGCCTGCAGGGAGACGTAAA |
| BRCA2     | CAGGACACAATTACAATAAA   | AAGTTGCGTATTGTAAGCTAT |
| POLQ      | AACCAGAAATGTTTATATGAAA | ATCAGTGTCTATAGCATCAA  |
| SPAG11B   | TTCTGCCATTCTGGTGAGAAA  | CAGGGATGTTGAAGTATCCCA |
| ATM       | CACCTGTTTGTAGTTTATTA   | TTGGCTTATACGCGCAGTGTA |
| HIST1H2AB | AGCCATCATAAGGCCAAGGGA  | CGCGGCAAACAAGGCGGTAAA |
| UBR2      | CTGGGAAGTATTATTGGATAT  | AAGAAACTATTTGCTGTTCGA |
| RRM2B     | GAGCAGTTCAGTGGTACATAA  | AACCAGGAGGTTATCATGGTA |
| RAD51     | AAGGGAATTAGTGAAGCCAAA  | CACGGTTAGAGCAGTGTGGCA |
| RAD51AP1  | TGCCGTCAAATCAGAATCTCA  | CTCTGTCTTCAGATACCACTA |
| GTF2H5    | CTCAATATCTTAGGTGACTGA  | AACATGGTCAACGTCTTGAAA |
| NONO      | CCAAGTGGACCGCAACATCAA  | CTGTGTTTGATTTGTCTCATA |
| POLK      | AGCTGTGAGTAAAGAGGTTAA  | AAGATTATGAAGCCCATCCAA |
| HSPA5     | TGGGATAAGGAAACACTTCTA  | TAGGGTGTGTGTTTACCTTCA |
| CDK7      | GAGGCTTTAAGGTAGCTTTAA  | CCGGATGGCTCTGGACGTGAA |
| BUB1B     | CAGATTTAGCACATTTACTAT  | ACGAGAATACCTAATATGTGA |
| RUVBL2    | CCAGGACGCCTTCTCTTCAA   | AACCGTTACAGCCACAACCAA |
| UVRAG     | GCCCGGAACATTGTTAATAGA  | TTGGATTAAGAGGCTAGACGA |
| KCTD13    | CTGCCGGAGAGTACGAGAGAA  | CAGCGTTATCAGTCTGTTTCA |
| PARP1     | CCGAGAAATCTCTTACCTCAA  | CAGGGAGACCCAATAGGCTTA |
| NUDT1     | CCGGGTTTCATCTGGAATTA   | CTCCTGCTTCAGAAGAAGAAA |
| PALB2     | TACGGTTGCGCCTGATGATAA  | CCAGGAGGATTACCTATACAA |
| TF        | CACCGAAGACTGCATCGCCAA  | CCGGAAGCCGGTAGATGAATA |

|          |                        |                        |
|----------|------------------------|------------------------|
| KIF4A    | CTGGTCAAGTTGTTTCTTATT  | AACTGTGGAACCATCAGAGAA  |
| TNKS     | CACCGCCACAAATTAATCAAA  | CAGATACAATGTCATTGCAAT  |
| DDX5     | TCGGGTATTTCGAGTGACCGA  | CCCGCCAACCGCAACCATTGA  |
| QPCT     | CTCTATGGGTCTCGACACTTA  | CAGGTTCAATTCATTCAACGAT |
| DCLRE1C  | CTGGCAACTGGTGAGAGTATA  | CTCCTCCTACAGTGAGATTAA  |
| NME4     | CAGCACATGGGTGGTACACTA  | CTGCCTGTCCCAAACCACTTA  |
| FANCI    | TTCCGGTTGTAAGAGCTTTAA  | TACGAAGACCTAGATGATATA  |
| GTF2H2   | TGGGATTTCCCTCAGCACACCA | CTGAACTTTCAGGAAACCCAA  |
| FANCD2   | CTCCGTATTTCCGGTACTGA   | AAGCAGCTCTCTAGCACCGTA  |
| TPP1     | CCAGCTCTCCTCAATACGGAA  | TTCAAGGATTACTGGATAGAA  |
| HUS1     | AGCAATCACCTTGTTATTGAA  | TCCCACAAAGGCCTTATGCAA  |
| THOC1    | CAGATTGAGTGTGACAGTGAA  | CTGAAGGTATTTGTACCGCAT  |
| CDKN2A   | TACCGTAAATGTCCATTTATA  | CAGAACCAAAGCTCAAATAAA  |
| HELQ     | CTGGTCGTGCTGGAATAGATA  | AAGAACGTTGTCAACAGGCTA  |
| TP53     | TTGGTGAACCTTAGTACCTAA  | TTGCAGTTAAGGGTTAGTTTA  |
| PARP2    | AAGTACTATCTGATTGAGCTA  | GGGCGAGAGCATTAAATGAAA  |
| GTF2H4   | CTGAACCGAGTACACCTACAA  | CCAGGTTTCATTGTCGTGGAA  |
| POLD3    | TCGAGTCAGCATTGACGATAT  | TGGCATTATGTCTAGGACTAA  |
| UBE2N    | TCCCAATTTGACAATCGTATT  | CTGGCCCTGAGCATGCATAAA  |
| TFAM     | GGCGGAGTGGCAGGTATATAA  | AGGGTGATTACCGCAGGAAA   |
| TP53BP1  | CAGGACAGTCTTTCCACGAAT  | TTGTTTGACCAGAGCAATAAA  |
| DPYD     | TTCCGGCCAAGAAATTAGACAA | TCCAACATACTTGATATTAA   |
| MGMT     | CCGGCTCTTACCATCCCGTT   | AAGGTTGTGAAATTCGGAGAA  |
| PMS1     | TAGCAATCGAGTAATCAAGAA  | ACAGTCGACCAGTACATCAAA  |
| MTHFR    | GACGTGATTGAGCCAATCAAA  | TGCCCTGTAECTTATCTAGAA  |
| DHX9     | CCAGAGCCTTTTCATCAATGAA | CTGGGCTATATCCATCGAAAT  |
| RBBP8    | AAAGACGACTTGATACCTCTA  | GACGTCAGCCTTACAACGCAA  |
| CSNK1D   | CCGGTCTAGGATCGAAATGTT  | CGCATCGAATACATTCAATCA  |
| RECQL    | TACTACGGCTTTGGAGATATA  | GCAGGTCGAGATGACATGAAA  |
| CCNH     | CTGAGCTTGCACCTAACGTAA  | AGGAAGCATATCAAACGTTTA  |
| PMS2     | TCCGATGCTCTGCATAATCTT  | TAGTGATGTCAACAAGCTAAA  |
| KPNA2    | CCGGGCTGGTTTGATTCCGAA  | ACGAATTGGCATGGTGGTGAA  |
| KIF18A   | CTCGAAGTGTAATTAACCCGA  | CAGGAGGACTTGGACTCTACA  |
| DCLRE1A  | TAGCTTCATAACAATGTTACA  | GACACTCATGATATCGATGAA  |
| C6orf167 | CTGGACCCCTTCTTTCCATATA | TTCCGGATCATAGATTGTTTA  |
| DUT      | AAGCCTTGGATGACACCGAAA  | TCCCTTCTCTTCACTAGTCTA  |
| NDC80    | CCGAGACCACTTAATGACAAA  | CAGCGGGAATACCAACTAGTT  |
| KPNA4    | TAGGCTGCCCATATAAGTCAA  | CAGATCGTCAGTGCCTGAGAA  |
| TOP3B    | CAGCATCCCTGTGCATATCAA  | CACGAGTACACTGGGACCTTT  |
| UBE2A    | AAGCGTGTCTGCAATAGTA    | TACCAGGAGAACAAACGGGAA  |
| UNG      | ATGGGATTTGTTGCAGAAGAA  | CTGGCTAAATCAGAACTCGAA  |
| RAD18    | ATGGTTGTTGCCCGAGGTTAA  | TCCGGGCTGGCAGTCATGAA   |
| DDB1     | CCACTAGATCGCGATAATAAA  | AAGCTCAACGTTGACAGTAAT  |
| MDC1     | ACCGTTGTAAGACCAGGCAA   | TCCGAGACTGTGGGAGCCTTA  |

| NCBI gene symbol | Target seq 3           | Target seq 4           |
|------------------|------------------------|------------------------|
| POLE2            | CCCAGTGTATTGGGCATATGA  | CCCGATCTACTTGTTCATTGCA |
| MPG              | ACCGCAGCATCTATTTCTCAA  | CAACCGAGGCATGTTTCATGAA |
| NFKBIL2          | TCCAATCACCTGGGTCGCCGAA | CCCATCCGGGTTTCGAGTTCAA |
| CA14             | AAGCAGGATCCTCGTATACCA  | TTGCATGAAGTCAGGCATAAA  |
| TGFB2            | TCCCAAGATTTAGAACCTCTA  | CAGCGCTACATCGACAGCAAA  |
| PRPF19           | CAGATCTACATCTGCAAACAA  | CACGCCAAGTTCATCGCTTCA  |
| TERF2            | TACCCATTTGTAAACCGAACA  | CAGGAGCATGGTTCCTAATAA  |
| HIST1H1E         | CCGCATCAAGCTGGGTCTCAA  | ACCCAAGGCGGCTAAACCAAA  |
| DNAJC5           | CAGGTTCTAAGCTTGGACCTA  | CGGGTTCAACTAAATCCAGGA  |
| EXO1             | GAACGAGTGATTAGTACTAAA  | AGGGTTAAATCTCCCAAGGAA  |
| BTG2             | TAGTAGTATGTTTGAAGCTA   | AAGGTTACTAATTGTATGATA  |
| POLB             | CAGGTTGATACCCAAAGATCA  | CAAGATATTGTACTAAATGAA  |
| ALKBH2           | CCACGGGAGCTTACTAATGAT  | CCCACCAACACGCACTGGTA   |
| XAB2             | CACCCGCGGCATCTACCAGAA  | CCGGCATGCCATGGCCGTGTA  |
| SUMO1            | CAGGTTGAAGTCAAGATGACA  | CTGAATCAAGGATTTAATTAA  |
| HNRNPM           | TGGCATCTTGTGACATCGAA   | CAGCTGCTATTTGATAGACCA  |
| UPF1             | ACGGAGCGCTGCACACCGAAA  | CACCATGAGCGTGGAGGCGTA  |
| ESPL1            | CTCCAGGAAGATCGTTTCCTA  | CAAGCTTCCCTGAATCATAAA  |
| RRM2             | CGGGATTAACAGTCCTTTAA   | CACACCATGAATTGTCCGTAA  |
| POT1             | CACCGTCTTGGACATTACTAA  | CAGGGTCTTGCCAGAAAGTAA  |
| PCNA             | CTCAGTATGTCTGCAGATGTA  | TCTGGTCTAGTTAACCTAGAA  |
| C7orf11          | TTGGATAATTAGTAAGGTCTT  | ACAGCAATACTCAAACATTCA  |
| LMNA             | CCCACCAAAGTTCACCCTGAA  | CAGGCAGTCTGCTGAGAGGAA  |
| RNF8             | CTGCCCATGATTACTGATCAA  | CAGCCTGTGATAGGCATTCAA  |
| DHFR             | AAGGTAACCTAACGGAAGGAAA | TTGAGGTACGGAGAAACTGAA  |
| PARP3            | CCAGACCAACATCGAGAACAA  | CACGCAGAAGCTCATCACTAA  |
| CACNA1G          | CACCCACAAGATGTTTCGACCA | CCGGCACAAGTACAACCTTGA  |
| RAD51L3          | CTCACTCTCTGTAAGCATATA  | CTGGGTGGAATAAGCTTATA   |
| FEN1             | ACCCAAGGGATCCACTAAGAA  | CAAGAGCTACTTTGGCCGTAA  |
| NTHL1            | GAGCAAGGTGAAATACATCAA  | GTGGACCAAGAAGGCAACCAA  |
| ERCC5            | CCCGGACTCTTTCAGCCATTA  | CGGCATGTCTATAGAACTTT   |
| DCLRE1B          | CACCTCTTGCATCGTCACCTA  | CAGGGTATTCTTCCAGGAGAT  |
| BRCA1            | TGGGATCGATTATGTGACTTA  | GAGGGATACCATGCAACATAA  |
| EEF1E1           | CACACTGTTGAAGGATCTTAA  | CAAGTCTAACAGGATTGACTA  |
| RPS19BP1         | CCGGCCTGTGGCCAAGACCAA  | CCGGAAGACGAAGGCAATTCA  |
| MSH5             | CCCGGGACTATGGCTACTCAA  | CAGACTTGATCCGCAGTGGAA  |
| TINF2            | TCCTGTGGATTTGGCCTCGAA  | CAGGCTTGATTGCCTAACTA   |
| FANCA            | AGGCCTATGCTAATCATTCTA  | AAGAAGCTGTCTTCCCTGTTA  |
| RPA1             | CAAGGTGTATTATTTCTCGAA  | CCGTGTGACGATCCCATGTTA  |
| PTTG1            | ATGGGAGATCTCAAGTTTCAA  | CAGATGATGCCTATCCAGAAA  |
| MAD2L2           | CCCGTGGGCATCTTCCAGAAA  | GTGGAAGAGCGCGCTCATAAA  |
| SRSF1            | ATGCGTGAAGCAGGTGATGTA  | CATCATAGTGCTTGCGTTTAA  |
| FANCF            | TACTAGGGAGATAGACCTTTA  | AACCAGCATTAGAGCTTTATA  |
| GTF2H1           | TCGGCTGAATACAGGGTCAAA  | AAGGCAAAGATAGATTTACAA  |
| GTF2H3           | TGGAGTAATGGCATTAAATCAA | TAGCAGATTCTTTGTTGGGAA  |
| RFC4             | ATGCATCTGATGAACGTGGAA  | CTGATGAACATTTGCAACTCA  |
| FAM175A          | ATGGCTAGAGTTGCCAGATAA  | TCAGGCGAAGTAAATGAGCAA  |
| SLX4             | CAGCAGGAGTTTGCACGGGTA  | AAGCGGAGACTTTGTTGAAAT  |
| XRCC6            | TTTGTACTATATACTGTTAAA  | GAGGATCATGCTGTTCCACCAA |
| LIG3             | ATGCGCCATGGTGGCCGATAA  | CAGCTGGTTGAAGGTCAACAA  |
| NBN              | AAGACTCACTATGGTCAGCTA  | CTACATGTTATTCTAGTACTA  |
| REV1             | CTGCCAGGTCCAAGCAATATA  | CAGCGCATCTGTGCCAAAGAA  |
| DMC1             | TCCCTGATTTATGATAACTAT  | TAGGTGGTGAATTGATGCAAA  |
| NEIL2            | AACCTAGAGCGGTGACATGAA  | CAGGGCTAGGGAACATCATT   |

|          |                       |                        |
|----------|-----------------------|------------------------|
| SBDS     | GAGGGTCATTATGGTATCGTA | TTGGATGATGTTCTGATTAT   |
| RBM14    | ATCGCGCAGCTCAACGGCAA  | TAGGGTTACAGATCCAGGTTA  |
| RAD54L   | TCCCTCCTGGTTACAGCTCTA | CAAAGTAGTGCTGGTGTCAA   |
| LIG1     | CACCTGCGAATACAAATATGA | CCCGTCATTTCTTTCAATAAA  |
| UHRF1    | TCGGATCATCTTCGTGGACGA | CAGGACGGCGCGGGAECTCTA  |
| XRCC1    | AAGCCTGAAGTATGTGCTATA | CCGATGGATCTACAGTTGCAA  |
| TK1      | GAGGCGCAATGAGCTGCATTA | CGGGCCGGACAACAAAGAGAA  |
| ABL1     | AACCAAGCCTTTGAAACAATG | AACGGCTGATGTGGACTGTCT  |
| MAD1L1   | CAGCGATTGTGAAGAACATGA | CAGGACCAAAGTGCTGCACAT  |
| XPA      | TTGAGTTGTACGAGTCTGAAA | CTGATGATAAACACAAGCTTA  |
| CBX5     | AACGGTGTGCGACATGGGAAA | AGGCGCGTGGTTAAGGGACAA  |
| CRY2     | GAGGCCATAGACAGATCTAAA | CCGGCTTAACATTGAACGAAT  |
| NUP98    | CAGTGTATTACTGCTATGAAA | CTGGAGTTAGCACTAACATAA  |
| C19orf40 | CCGGATGAGTGAACAATACTT | ATCCAGTTGGTTCAAGAGCAA  |
| FANCB    | TAGCTTAGTACTGATAGATGA | CCGGCTATGCCCTGAATTCAA  |
| DCK      | AGGCAGCCTGCTATAAAGTTA | CTCCAGAGACATGCTTACATA  |
| RPIA     | CAGTGATCTCCTGATGCCTTA | CGAGGTCATCCCAATGGCCTA  |
| FANCC    | AAGGCAGGATTAATTCAGTTA | CTGGCCCCGAGAGCTCCTTAAA |
| RNF168   | AAGGGAGTGCTTTGTGATCTA | CAGGAAAGACTCCGATCTAA   |
| GEN1     | CTGGTTGGATTAGCAATACTT | ATGGAGAATTTGCTTTATTAA  |
| ERCC3    | CCGAGCGGACCGCGACAAGAA | ACCCATGTGCATGAGTACAAA  |
| MBD4     | CACGACGTAAAGCCTTTAAGA | AAGAGAATCTGTGTGAATAA   |
| ALKBH3   | AAGAATCACTATGGAACCAAA | ATCAGAGAGGATATAACTTAT  |
| HMGB2    | TTGCTAAGAATGTGAATTCAA | AGGAATTAGTATCAATAGTAA  |
| POLL     | CAGGGCTTCCGAAGTCTGGAA | CACCGGCTCTGCACACTTCAA  |
| SFPQ     | TGGCACGTTTGTGACGAATA  | TGGCATAGGTTATGAAGCTAA  |
| TREX1    | CTGGTGCCTGGTGGCACACAA | CAGCAGCAGGTACGTACCCAA  |
| MLH3     | GAGGAATTTATCCGAGAACAA | CTCCAAACCAATCGTCCGTAA  |
| RAD23B   | AACTGTGGCTCAGGCTCCAAC | ATAGGTCGAGAGAATCCTCAA  |
| GADD45G  | CGGCGTCTACGAGTCAGCCAA | CTAAAGGATGCTGCTGTTGAA  |
| RAD1     | AGGTATCTATTCCGACAGATA | TCGAATGTGTTACCAAGGTTA  |
| FAN1     | AAGAAATTGTCGAGACGAATA | TTGGGAAGCCTAGCATCTAAA  |
| FANCL    | ATGCGGATACCTGCTTCAGTA | TCAGAGCTCCTTAATAAGCAT  |
| RPA2     | AAGGCTTGTCGAAGACCTGAA | CCAGGTGTTGAATTTGATTAA  |
| XRCC5    | TTCCGCTATGGAAGTGATATA | ACCCTCATAAGTCGTCACTAA  |
| TDP2     | CAGATGTGGTGGTTTACCCAA | AAGAAGGATATTTACAGCTA   |
| RPL5     | AAAGCTCATGCTGCTATACGA | AACGCTTGGTGATACAAGATA  |
| ATR      | GACCGGATACTTACAGATGTA | GCCGCTAATCTTCTAACATTA  |
| RPA3     | TCGCTGATTGGTGCCGAGAAA | AAGGGAGTAAATCGACCCTCA  |
| HERC2    | GAGGAACATGTTCTGTATCCA | TGGAATCAGCAGCTACGATAA  |
| TDG      | ATGGTGGTGCTTACGGAGAAA | TCCAGTAAAGAATTTCTGTGAA |
| CHAF1B   | CTCCACCAAGTTCTGTACCAA | AAGAATTAGGAAGATGAGAAA  |
| ATRX     | AGCAGCTACAGTGACGACTAA | ACCGCTGAGCCCATGAGTAA   |
| CHEK2    | ACGCCGTCCTTTGAATAACAA | AAAGAACAGATAAATACCGAA  |
| RALY     | ATGCCTTTGTTCAGTACTCCA | CTGGCTAAGCTCATCATTGTT  |
| POLE     | CTGGATGGATCCATCTAACTA | CCGCATCATCCTCTGTACAAA  |
| PNKP     | CACGTGAACAGGGACACGCTA | CACGTGTGAGACAGCCCTGAA  |
| POLM     | CAGAGAGGTACCAGACCATGA | CGGGAAGGACTGCGAACCTTA  |
| BCL2L1   | TTGGCTTTGGATCTTAGAAGA | CTGCTTGGGATAAAGATGCAA  |
| FANCG    | CCCAGGTAATCGAGACACTTA | CCGCGGGAACCTAACTCTTCAA |
| HMGB1    | AAGAGTAATCAATCTACTCAA | AAGGATATTGCTGCATATCGA  |
| SIRT1    | CAGGATTATTGTATTTACGTT | CAAGCGATGTTTGATATTGAA  |
| TOP3A    | TGGACTGACTGTGATAGAGAA | CACGGCTTGCCTAGTTCTCTA  |
| INTS3    | CGGGATCTCGTAAGACTACTT | AAGGATAGCATTATGAACATA  |
| FANCM    | ATGGGTAGAACTGGCCGTAAA | CTCGACGTGCAGTAATGCTAA  |



|          |                        |                        |
|----------|------------------------|------------------------|
| WRNIP1   | TGCAGCGGTTATGCTTATGAA  | GAGGCGCAGTTCCTTTCGAATA |
| MLLT1    | CAGCTCAGACTCAGACTTCGA  | CACCTTCGACTTCGACCTCTT  |
| UBE2B    | ACCTCTCATTAGAAAAGGCTAA | CCCAGTATTAGCAATGAATTA  |
| VRK3     | CTCACTCAAACCTGGATGCCAA | CCGAGTGACCACCTCACTTGA  |
| RAD51C   | CCCTCCGAGCTTAGCAAAGAA  | AAGAAGGTACAGCACTGGAA   |
| RFC1     | AAGGCGATTGTTGCTGAGTCA  | GAGGCCAAGTCTCTAATTGAA  |
| POLG2    | CACGGTGCCTTGGAACACTAT  | CAAGGGCTATTTAATGAGTTA  |
| CTPS2    | TCGGTTCGAGGTAAACCCCTAA | ATCGACGTGAAATTCACGTAA  |
| SLX1A    | CAGACCTGCTGGAGACCTGAT  | ACCCTAGGTCACGGCAATCAA  |
| RAD50    | CTGGCTACATAGTAAATCAAA  | CTGCGACTTGCTCCAGATAAA  |
| PARP4    | TAAGTTGGACAGAGTCATGTA  | CCGATATCTTAGCTTATTGTA  |
| TOPBP1   | CGGCTCTGTAATAGTCGACTA  | ACGAGTATACAGAGACCTTAA  |
| SMARCAL1 | TTGAGTTATGAGTTAGGTCAA  | CAGCTTTGACCTTCTTAGCAA  |
| RPA4     | AAGGATTATGCGATCAGGTGA  | CAAAGTGTGGTATCCTCAA    |
| PRKDC    | CTCGTGTATTACAGAAGGAAA  | TAAAGCTATAATTATGGCTTA  |
| TDP1     | CACAAGCGCAAATCTGTCCAA  | CCAGAAGTGTATGGAAGTAAA  |
| TERF1    | TTGCCAGTTGAGAACGATATA  | ATCATCTTGATGTCTATGATA  |
| KPNA1    | AGGAAGCATGTTGGACGATAT  | TAAGGCGTTGCTCATTACAAA  |
| OGG1     | CACCGTGTGGGCGAGGCCTTA  | CGGGACCTACACCTCAGGAAA  |
| PMS2P4   | CAGAACTGTGAGTCAATTA    | TGCCACCAATATTGATCTAAA  |
| TOP2A    | AACCAGCGTGTTGAGCCTGAA  | CCGCGTGGTCAAAGAGTCATT  |
| HNRNPU   | TTGGCTGGTCACTAACTACAA  | CTGGGAATCGTGGCGGATATA  |
| GADD45A  | AAGGATCCTGCCTTAAGTCAA  | CTGGAGAGCAGAAGACCGAAA  |
| PMS2P3   | CTAGACTAGGCCGTCGCTGTA  | TATGATTATCACCAAGCCAAA  |
| EP300    | TTGGACTACCCTATCAAGTAA  | CACCGATAACTCAGACTTGAA  |
| MLH1     | CAGTGGATTGATTATAAATAA  | CACCAGATGGTTCGTACAGAT  |
| RAD51L1  | CCCAGTTATCTTGACGAATCA  | CCCGGCATGGGTAGCAAGAAA  |
| RPL11    | CGGGAACTTCGCATCCGCAAA  | ATGGCGCAGGATCAAGGTGAA  |
| C11orf30 | TTCATGCGTATTCAGAATGTA  | ATGGTGCAATTATGACAACTA  |
| DDX17    | CGGGATCGTAGTGAACCCGAT  | CTGGAGTGCATTTGATAGTTA  |
| KPNA3    | CTGATAATGGCCGGTGATGAA  | AAGCGTATGTTTTAACTGCAA  |
| BUB3     | AACGAGATGCAGAACCCTTGA  | GAGGACTAGATCATCAATTGA  |
| PML      | CTCCAAGATCTAAACCGAGAA  | CAGGGACCCTATTGACGTTGA  |
| SIRT6    | GTGCGAGGATGTCGGTGAATTA | CTCCCTGGTCTCCAGCTTAAA  |
| OBFC2B   | CAGAACGACAGCAACCCTTCA  | AACCCTGTTAGTAACGGCAAA  |
| PER1     | CAGCAATGGTTCAAGTGGCAA  | CCAGCGCGTCATGATGACCTA  |
| SPO11    | ACAACATAATGTTAACGCATAA | CAGAGTGTACTTACCTAACAA  |
| FANCE    | TCGAATCTGGATGATGCTAAA  | AACGCCGAGGAGAGCTTGTA   |
| XRCC2    | CTCCGGCTAGTTACAATTCTT  | CACGATGTATACTTCCCAAAT  |
| ERCC4    | CTCGCCGTGTAACAAATGAAA  | CAGCACCTCGATGTTTATAAA  |
| CHEK1    | AACTGAAGAAGCAGTCGCAGT  | AAGAAAGAGATCTGTATCAAT  |
| MCM2     | CACGGTCATTGCTGCCGCCAA  | CAGCGACATGTGCAAAGAGAA  |
| UIMC1    | CACGTCGTGACTTAAATGAAT  | CAGTATTGACTCGGAGACAAA  |
| POLD1    | CCGGTTCATGGTGGACACGGA  | CAGTTGGAGATTGACCATTAT  |
| XRCC3    | GAGACACTTAAGGGAAATTA   | CAGAATTATTGCTGCAATTA   |
| TOP1     | CACAACGATTCCCAGATCGAA  | CGGGAAGGACTCCATCAGATA  |
| RM1      | AAGGTAATCTAGTTAACTAGA  | GAGGTTTCAAGTAATCCACTA  |
| BUB1     | AACCAGTGAGTTCCTATCCAA  | AGGGCCCTACGTAATAGGCTA  |
| EME1     | AAGGACCTGATCTTAGATCCA  | CAGAATTTGCTCGCAGACATA  |
| RPS9     | CCCXCGGAGACCCTTCGAGAA  | ACGGCGTCTGTTCAAGGCAA   |
| EME2     | TGGGCAAACCTGGACGTGCTA  | CTGGGAGATCTCAGACTCCGA  |
| SUPV3L1  | TGGGACTTAATTTGAGCATAA  | CACGATTGTCAGGAACCTTAA  |
| CSNK1E   | CGGGTCCTTCGGAGATATCTA  | CCCGTTCTCCTGTGTCTACTA  |
| POLD2    | GAGCAGGGATTCTATCAATAA  | CCGGGTTATCCTCGCTGGCAA  |
| RAD17    | CCCTGTGGCACCAACAATTAT  | CAGTGGTTTCTAATAAATAAA  |

|           |                        |                        |
|-----------|------------------------|------------------------|
| BRIP1     | AAGATAAACAGTCCACTTCAA  | TAGCATGGCAACAATCTCTTA  |
| SMC1A     | TCGGAAGTGAATGACAAGAAT  | CGGCGTATTGATGAAATCAAT  |
| REV3L     | CACCGTCACCCTAACGAGAAT  | TGGCGATAGTATTGTTCAAAA  |
| POLR1C    | CCCGGGTTTCGAGATCATTATA | ACGCGCGAGATAGAACCCTCTA |
| APTX      | CACCTTGAACCTTAAAGCAT   | CACCAGCGAATCAGACTTCCA  |
| ERCC6     | CAGAGCGTTTAGAAAGTGAAA  | ATGGATGGTACCCTACAATA   |
| YY1       | ATGCCTCTCCTTTGTATATTA  | GACGACGACTACATTGAACAA  |
| SUCLA2    | CAGAATGGACTGTTTGTACGA  | AAGGTCCTGTATTAATAGGAA  |
| IGHMBP2   | CCCAGCCTCCTCACTCATAGA  | AAACGTGGTCCTTGCAACAAA  |
| RAD23A    | CAGAACCGTGTCTCTGATAAA  | CCCAGAGAGCCTGGTCATCCA  |
| RECQL4    | ACGGCTCAACATGAAGCAGAA  | CCTCGATTCCATTATCATTTA  |
| SETMAR    | TTGACCCTACTTATATAGGAA  | TACCTTGAATTTATACCGAA   |
| RAD9A     | CAGGCTCACCTTCTAAGGAA   | TGGCGCTGACTTGAATTCTA   |
| C10orf92  | CAGGAGAGGCGAGGACCTGAA  | CACGCTCAACTTGGTCCTGTA  |
| SMUG1     | CAGGATACCTACCCATCCTTA  | CTCGAAGTCATTCTTGGCCAA  |
| APEX1     | CTCAAAGTTTCTTACGGCATA  | CTGGGATGAAGCCTTTTCGCAA |
| ATRIP     | CAGGGTCATCCCTAAGCCTTT  | CACGGTGATGTTGCACAGACA  |
| SUPT16H   | ACGCTTATTATCGGCGAGTGA  | ACCGGAGTAATCCGAAACTGA  |
| RAD54B    | AAGCTACTGGCACATAGTGAA  | AACCCCTCCTGTTTACTGAA   |
| POLG      | CTCACTGACAATAGTGCCATA  | CACGAGCAAATCTTCGGGCAA  |
| UBE2I     | AAGGGATTGGTTTGGCAAGAA  | AAGGGTCCGAGCACAAGCCAA  |
| LIG4      | AACCTTACTAACGTTAACAAA  | CACCGTTTATTTGGACTCGTA  |
| DDB2      | TCCCTCCATGATCTTCGCATA  | GACGTGTTGATGGAAACTCA   |
| ERCC8     | ATGGGATACAAATACATTACA  | TTGGTAGCAGTTGGTACTAGA  |
| CENPE     | TGGGACCAGTTCAGCCTGATA  | TAAGATGGTCCTTGAGGAGAA  |
| SSBP1     | TCCCTGAATCGTGTGCACTTA  | CGAATTTATTTGGAAGGGAAA  |
| MSH3      | AGCCCGAGAGCTCAATATTTA  | TCGAGTCGAAAGGATGGATAA  |
| TNKS2     | CACAACCATGCCAATGAACGA  | GAAGGTATGGTCGATGGATAA  |
| IP6K3     | ATGGTGGGCACTGAGAGACAA  | CTCCGAGTACCCAGAGAACAA  |
| ERCC2     | CCCATACTTCCTTGCTCGATA  | CCCGCTCACCCCTCCTTGCTAA |
| SSRP1     | CCGGGATGAGAAGAAGCGGAA  | TTCGTTGACTCTGAACATGAA  |
| NEIL1     | CAGAGACTCTCCGCAACAGAA  | CGACTGTTGTTGGTGCTTAA   |
| DNA2      | CAGCGCCAGAACAAGTTGAAA  | CAGGTTGTTCTGTACTACTTA  |
| MAD2L1    | ACGGACTCACCTTGCTTGTA   | CAGAAAAGCTATCCAGGATGAA |
| MSH6      | CACGCCATCCTTGCAATACGA  | AAGCCTATTGTGTGCTTGTTA  |
| SHFM1     | AAGAAGTGTTGAAGTAACCTA  | CCGGTAGACTTAGGTCTGTTA  |
| DDX1      | ATGAAAGTCTGTAGCTTAAA   | CACGGTGTTTCTTATGTTATA  |
| ERCC6L    | AAGCCTAGTGCTCTAGCTCAA  | CACGGGCTTGTGTTTGCTAA   |
| CETN2     | AAGCTCTTTGATGATGATGAA  | CAGAACGACTTTAGACAAGCA  |
| RECQL5    | TGCGACCATGGCTGTAGTAAA  | CAGGAGGCTGATAAAGGGTTA  |
| TERF2IP   | CTCGGAGGATTGAATTTGCAA  | ATGGTAGGTGAGGTGGTAAA   |
| MMS19     | CAGCGGCGGACAATCCTTGAA  | CTAGACTGTTCTGACAATCTA  |
| DDX3X     | CAGATTCGTAGAATAGTCGAA  | CACAGGTGTGATACAACCTAA  |
| MSH4      | ATGCAGTGAGGTCTAACATAA  | ATCAATTGTCTTGGATGCCAA  |
| PELP1     | CACGGTTCGGACCAAGGTGTA  | CAAGGTGTATGCGATATTAGA  |
| TMPO      | GACAGATACAGTGACAATGAA  | CCGGACTTCTCCAGTGACGAA  |
| TREX2     | CACGACGAGTCTGGTGCCCTA  | CACAATGGCTTTGATTATGAT  |
| APC       | CAGACTAAGCATTGAGCATAA  | CCGGTGATTGACAGTGTTC    |
| TYMS      | AAGGATGTTGCCACTGGCAAA  | AAGAGTGATTGACACCATCAA  |
| RDM1      | ATGCCAAGAAGTGGCGAATTA  | AAGGTTGCTTGGCACCAGA    |
| PIF1      | CTGGGCGATGTCCATCCACAA  | TCCGGACACTACGCTGGTAA   |
| POLI      | GCGGTTTATTAAGCTCTTCTA  | ACCGGGAACATCAGGCTTTAA  |
| UBE2V2    | AAGACGTCTAATGATGTCCAA  | GTCAGTTAGATTTGTAACAAA  |
| MNAT1     | TCGGTGTAAGACCACCAAATA  | GTGGATTTGGACAACACCAA   |
| HIST1H2BK | AAGCACAATTGCCTTCGGTTA  | AGGCTCGTAGTTCGCCTTCAA  |

|           |                        |                        |
|-----------|------------------------|------------------------|
| HDAC1     | CCACAGCGATGACTACATTAA  | CACCCGGAGGAAAGTCTGTTA  |
| MSH2      | TTGGATATTACTTTCGTGTAA  | TCCAGGCATGCTTGTGTGAA   |
| RRM1      | AACGGATATATTGAGAATCAA  | CAGGGCCCATACGAAACCTAT  |
| POLA1     | CAGGTCGAGAGTACAGAAGAA  | CTGGAGAAACTTACTACCGAT  |
| NEIL3     | TCGGATATACAGCATATTCCA  | ACGGATTCATTTCCGGAATGAA |
| BLM       | CTGACCATCTGTGACTATAAA  | CCGAATCTCAATGTACATAGA  |
| WRN       | CTACGTGACTTTGATATCAAA  | CCACGGAGGGTTTCTATCTTA  |
| USP1      | CTGGGACCCATGAATCTGATA  | ATGTGGCAGAATTACCTACTA  |
| XPC       | TCGGAGGGCGATGAAACGTTT  | TAGCAAATGGCTTCTATCGAA  |
| HDAC2     | CTGGGTTGTTTCAATCTAACA  | ACGGTCAATAAGACCAGATAA  |
| RAX2      | CAGGTGTCCCGTGGAAATCGA  | ACCGCTGACTCTGTAAGATGA  |
| MUS81     | CGGGAGCACCTGAATCCTAAT  | CACGCGCTTCGTATTTAGAA   |
| ERCC1     | TACGCCGAATATGCCATCTCA  | CCCTGGGAATTTGGCGACGTA  |
| DDX21     | GCGCTCCTTGATCAACTCAAA  | CTGGGTTGTAATACAGTTTAT  |
| ENOSF1    | CTGGTGCAGCACCTGATTATA  | ATCCCGGCTACTCAACAGAAA  |
| POLN      | CTGCGAGACCTTCATCCATTA  | ACGGTTTCTTATAACGAGCAA  |
| CHAF1A    | CACGCACGTTTCCACCCGGAA  | ACCTAACGAGGCAGTGTATAA  |
| RPS3A     | ACGCAACAATCAGATACGGAA  | ATGGATCTTACCCGTGACAAA  |
| MUTYH     | CACATCAAGCTGACATATCAA  | CAGGAGGAATTTACACCCGCA  |
| RAE1      | TTGGGATACTCGATCGTCAAA  | CAGCAGTAACCAAGCGATACA  |
| MRE11A    | TGCGATTTCAGTTCACCGCTAA | ATGCGACAGCTTTACTTTAAA  |
| H2AFX     | CACGACTAGAACCTTAGGCAT  | CCGGGACGAAGCACTTGGTAA  |
| APEX2     | AACATGGATGAGTTTACCCAA  | CCCGGGTACAGACATGCCAAA  |
| NHEJ1     | TAGCAACGTTACTTTCATATGA | CTGCAAGGAATCGATAGCCAA  |
| RAD52     | TGGGCCCCAGAATACATAAGTA | CAGGAGTGACTCAAGAATTAA  |
| TERT      | CTGGGAATTTGGAGTGACCAA  | CCCGGTGTACGCCGAGACCAA  |
| POLD4     | GACCCATGATCTGGCAAGTTA  | TTCACTAATGCTTATCAATAA  |
| XRCC4     | CAGCGAATGCAAAGAAATCTT  | CAGCTGATGTATACACGTTTA  |
| POLH      | GAGGCAGTGTATAAAGTAAA   | CAGCCAAATGCCATTTCGCAA  |
| CLK2      | AAGAGCGATATGAAATCGTTA  | TCGCCTGGATTGGGATGAGAA  |
| HIST1H4A  | GCGGATCTCTGGTCTGATCTA  | CAGCTTGCATTTCTGAACCAA  |
| NCOA6     | AGGCGGGATTTCTATGGCAA   | AAGGAGCTAATGCCATTATAA  |
| TFAP2A    | CCGGGTATTAACATCCCAGAT  | CAGCTCCACCTCGAAGTACAA  |
| BRCA2     | AAAGTGCTTCTGGTTATTTAA  | TTGGAGGAATATCGTAGGTAA  |
| POLQ      | AAGACTGTAGGTACTATGAAA  | CACATTTATATCCCAAATAA   |
| SPAG11B   | CTGCTACGCCACGCAGTGAAA  | CACATTGTCTTTGAGAATGA   |
| ATM       | AACCATGAGTCTAGTACTTAA  | AAGGCTATTTCAGTGTGCGAGA |
| HIST1H2AB | AAGTGAAGAGTTAACGCTTCA  | CCGCAATGACGAGGAGCTTAA  |
| UBR2      | AAAGCTGTTAACTGTACACAA  | ATCATCGATATAGGATGACAA  |
| RRM2B     | CTCATCGAGAATGTTCACTCA  | AAGGGCTTATGGACTGAGAAA  |
| RAD51     | CACTTCTAAATTAATGGTAAA  | CAGGATAAAGCTTCCGGGAAA  |
| RAD51AP1  | CAGCTTTACAAGGGTGTTTAT  | ATGGCATATGTCTCCGATTTA  |
| GTF2H5    | CAGGAGCGAGTGGGTGAATTA  | ATGGACCATTTAGGAATTATA  |
| NONO      | AAGGCATTGTTGAGTTCTCAG  | TCTGTGTGGTATATTGTTTAA  |
| POLK      | AACCTCTAGAAATGTCTCATA  | TGGAATTAGAACAAAGCCGAA  |
| HSPA5     | CTCCTGCGTCGGCGTGTTCAA  | CTGACTCGGGCCAAATTTGAA  |
| CDK7      | GACGACTTACTAGATCTCATA  | TTGGACATAGATCAGAAGCTA  |
| BUB1B     | AAGCTCGAGTGTCTCGGCAAA  | CTGGATGTTTGGGATAGGTAT  |
| RUVBL2    | CACGCAGTACATGAAGGAGTA  | CCGGAGATCCGTGATGTAACA  |
| UVRAG     | AAGGATCTATGCACTGAATGA  | CAGCGGGCAAATGTTATCAAA  |
| KCTD13    | GACGAGCGTCTCATGGCCAA   | CCCGAACAGCAAATACGTGAA  |
| PARP1     | ACCCAAGGGCTAATAGTAATA  | ACGGTGATCGGTAGCAACAAA  |
| NUDT1     | TCAGGACACCATCCTGGACTA  | CGAGTTCTCCTGGGCATGAAA  |
| PALB2     | AAGGTAGCAGTGAACCTACTA  | CTGCATAAACATTCCGTGCAA  |
| TF        | TGCACTTTCCGTAGACCTTAA  | CAGGGCCATTGCGGCAAACGA  |

|          |                        |                       |
|----------|------------------------|-----------------------|
| KIF4A    | CTGAATTATGTTTCAATAGTA  | CAGGTCCAGACTACTACTCTA |
| TNKS     | ATGCAAAGTACTATTCCGAGAA | AAGGATGTTGTAGAACACTTA |
| DDX5     | AAGAGCGTGAAGCTGGTCTAA  | GTGCTTCGTGAAGCTAATCAA |
| QPCT     | TTCGAAAGACTTCAAGCAATT  | CAGGTGGTTCGAAAGACTTCA |
| DCLRE1C  | CAGGTTTCATGTGAATAAGCTA | AAGTACGGAGCCAAAGTATAA |
| NME4     | GACGCCTTTATGCAAGTTGTA  | ACCAACTACCTCCGTCAGCAA |
| FANCI    | CACGGGCATCTGGGAGATATA  | CTGGCTAATCACCAAGCTTAA |
| GTF2H2   | ATGGCGCATTGGATGGCAAT   | CAGTAGTACTTCATTCAATTA |
| FANCD2   | CGGCTTCTCGGAAGTAATTTA  | CAGAGTTTGCTTCACTCTCTA |
| TPP1     | CCAGGAGGAAGCTGTAACGAA  | AAGATGCGTGATACTCAACAT |
| HUS1     | CTCCGTGGAGCTGTTATCTAT  | ACCAGTCTTGAAGACTATGAA |
| THOC1    | AACACCTGAGAATCTGATTAA  | GTGCTCTATTCCAATTGATTA |
| CDKN2A   | CACGCCCTAAGCGCACATTCA  | GCCCCGATAGATGCCGCGGAA |
| HELQ     | ATGCCTCGAGGATATATACAA  | TTGGGTGATCATTCTATGAAA |
| TP53     | CAGCATCTTATCCGAGTGGAA  | AAGGAAATTTGCGTGTGGAGT |
| PARP2    | AGGCAGGTTACCAGTCTCTTA  | GACCAACTATAGAAACCTA   |
| GTF2H4   | CAGCAGATAATCCATTTCTTA  | AGCCCACCCAGTGATGCTCAA |
| POLD3    | AAACCCGTACAATGAGATAAA  | CTGAATTGTTAGTAGGTCTAA |
| UBE2N    | AAGATAGTACTGAATGGAGTA  | ACCTTGCTCTTGCAAGTTAA  |
| TFAM     | AAGGAATTATATATTCAGCAT  | AGGACGAAACTCGTTATCATA |
| TP53BP1  | CTCCAGAACTACCGTAATTAT  | TTGATGCTTTCTACAAGTGAA |
| DPYD     | CATCACAAGTATTGCAAACAA  | TCGAGAGTATCCTGGCTTAA  |
| MGMT     | AAGCTGCTGAAGGTTGTGAAA  | GACAAGGATTGTGAAATGAAA |
| PMS1     | CAGCGAATGGTTTCAAGATAA  | ACGACTTGTTATGGACCATTA |
| MTHFR    | AAGCGCCGAGAGGAAGATGTA  | CTCGGGAGAACCAAACCGGAA |
| DHX9     | AGCGTTTCGATTTGAGTCTATA | TTGGTTGTTGAAGTAACCAA  |
| RBBP8    | CATGTCCGATACATAGAACAA  | CTGGCGTTAACCGGCTACGAA |
| CSNK1D   | CCCTTCCGAATTTGCCACATA  | CTCCCTGACGATTCCACTGTA |
| RECQL    | CCCATTGATCTCTTTATGGA   | AAGCAAGGAGATTTACTCGAA |
| CCNH     | CAGATGCAAAGCCGTGGCCAA  | AAGATGATGATTACGTCTCAA |
| PMS2     | AAAGACCTCTTTGATAGGAAT  | TGGATGTTGAAGGTAACCTAA |
| KPNA2    | TTCGTTAAGCTTAATTGAGAA  | CCGAGACTTGTTATTAAGTA  |
| KIF18A   | CAGGTGGAACCTAATCTGGTTA | ATCCGTCTACAGTAACCTTAA |
| DCLRE1A  | CGAGGATTCAAGTAGTAGTTAA | ATGTAGCTTGTTAGTAGTTAA |
| C6orf167 | CAGCCACTATCCACCAATAT   | CTGGTTGAATAAACTACTTAA |
| DUT      | ACCCGCCATTTACCCAGTAA   | AAGCCTGTATTTAACTCATAT |
| NDC80    | CACAATTAGCAGAGTATCACA  | TCCCTGGGTGCTGTCAGGAAA |
| KPNA4    | AAAGATCTTTGCATGAGGTAA  | ATGGGATCTGCTGCTGCATTA |
| TOP3B    | GCGGTTGTTAGCAGAAGGTAT  | CACGGCTACTATAAGATTGAT |
| UBE2A    | CCCTTCTACCCTCTCCTTAAA  | AACACCCTCTATGAAATCAAA |
| UNG      | TACGCGAGGTTTGTTAATAAA  | CTACGCGAGGTTTGTTAATAA |
| RAD18    | CAAGACAGAATCGCCGCACAA  | AAGACTAGGATGCGTCTTGAA |
| DDB1     | ACCTATCACAATGGTGACAAA  | ATGCAGAATCGACTCAATAAA |
| MDC1     | TAGGGCGGCTACATATCTTTA  | CAGGGTCAGCCATTATACATA |
